# Supplementary material for: Immunomodulatory Function of Polyvinylpyrrolidone (PVP)-Functionalized Gold Nanoparticles in Vibrio-Stimulated Sea Urchin Immune Cells
Source: MDPI journal article supplement (doi:10.3390/nano11102646), 2021-10-08
Supplement: s1 [file s1]

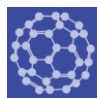

Supplementary Materials

# Immunomodulatory Function of Polyvinylpyrrolidone (PVP)-Functionalized Gold Nanoparticles in *Vibrio*-Stimulated Sea Urchin Immune Cells

Andi Alijagic <sup>1</sup>, Angela Bonura <sup>1</sup>, Francesco Barbero <sup>2</sup>, Victor F. Puentes <sup>2,3,4</sup>, Francesco Gervasi <sup>5</sup>  
and Annalisa Pinsino <sup>1,\*</sup>

<sup>1</sup> Consiglio Nazionale delle Ricerche, Istituto per la Ricerca e l'Innovazione Biomedica (IRIB), 90146 Palermo, Italy; andialijagic@gmail.com (A.A.); angela.bonura@irib.cnr.it (A.B.)

<sup>2</sup> Catalan Institute of Nanoscience and Nanotechnology (ICN2), CSIC and BIST, Campus UAB, Bellaterra, 08193 Barcelona, Spain; fra.barbero@gmail.com (F.B.); victor.puentes.icn@gmail.com (V.F.P.)

<sup>3</sup> Institució Catalana de Recerca i Estudis Avançats (ICREA), 08010 Barcelona, Spain

<sup>4</sup> Vall d'Hebron Institut de Recerca (VHIR), 08035 Barcelona, Spain

<sup>5</sup> Specialistic Oncology Laboratory Unit, ARNAS Hospitals Civico Di Cristina e Benfratelli, 90127 Palermo, Italy; francesco.gervasi@arnascivico.it

\* Correspondence: annalisa.pinsino@irib.cnr.it

**Table S1.** Results from two-parameter flow cytometric analysis of immune cells of four sea urchin *Paracentrotus lividus*.

| Donors | Subset of cells | Control         | PVP-AuNPs      | <i>Vibrio</i>   | PVP-AuNPs plus <i>Vibrio</i> |
|--------|-----------------|-----------------|----------------|-----------------|------------------------------|
| A      | Group 1         | 74.1            | 72.9           | 65.4            | 69.2                         |
| B      |                 | 68.3            | 69.1           | 71.3            | 67.5                         |
| C      |                 | 53              | 53.6           | 52.5            | 65.1                         |
| D      |                 | 66.4            | 68.8           | 72.2            | 72.3                         |
|        | Mean $\pm$ SD   | 65.5 $\pm$ 8.9  | 66.1 $\pm$ 8.5 | 65.4 $\pm$ 9.1  | 68.5 $\pm$ 3.0               |
| A      | Group 2         | 9.9             | 7.71           | 9.91            | 9.79                         |
| B      |                 | 5.57            | 5.81           | 8.29            | 11.8                         |
| C      |                 | 6.25            | 6.45           | 12.3            | 8.48                         |
| D      |                 | 8.45            | 7.23           | 7.10            | 6.79                         |
|        | Mean $\pm$ SD   | 7.5 $\pm$ 2.0   | 6.8 $\pm$ 0.8  | 9.4 $\pm$ 2.3   | 9.2 $\pm$ 2.1                |
| A      | Group 3         | 2.3             | 4.79           | 1.44            | 2.91                         |
| B      |                 | 12.4            | 12.7           | 9.65            | 11.6                         |
| C      |                 | 32              | 32.6           | 28.8            | 30                           |
| D      |                 | 14.9            | 14.8           | 9.62            | 10.2                         |
|        | Mean $\pm$ SD   | 15.4 $\pm$ 12.3 | 16 $\pm$ 11.3  | 12.4 $\pm$ 11.6 | 13.7 $\pm$ 11.5              |

A: Immunologically quiescent donor (Results are graphically represented in the Figure 4 of this manuscript). B: Immunologically quiescent donor. C: Immunologically active donor. D: Immunologically active donor.

**Table S2.** Individual values and the means  $\pm$  standard deviations of the percentage of cells stained with Anti-CD45 and -CD14 from grouped quiescent and active *P. lividus* donors.

| Donors | Percentage of cells | Control         | PVP-AuNPs        | <i>Vibrio</i>   | PVP-AuNPs plus <i>Vibrio</i> |
|--------|---------------------|-----------------|------------------|-----------------|------------------------------|
| A      | CD45 <sup>+</sup>   | 17.83           | 14.53            | 2.06            | 4.02                         |
| B      |                     | 1.08            | 1.54             | 0.48            | 1.16                         |
| C      |                     | 0.06            | 0.16             | 1.31            | 1.95                         |
| D      |                     | 2.44            | 4.25             | 0.28            | 0.73                         |
|        | Mean $\pm$ SD       | 5.35 $\pm$ 8.38 | 5.12 $\pm$ 6.5   | 1.03 $\pm$ 0.82 | 1.97 $\pm$ 1.46              |
| A      | CD14 <sup>+</sup>   | 20.43           | 32.03            | 6.41            | 12.47                        |
| B      |                     | 2.43            | 3.28             | 1.36            | 3.23                         |
| C      |                     | 0.03            | 0.05             | 0.16            | 0.32                         |
| D      |                     | 1.15            | 0.43             | 0.13            | 0.18                         |
|        | Mean $\pm$ SD       | 6.01 $\pm$ 9.66 | 8.95 $\pm$ 15.46 | 2.02 $\pm$ 2.99 | 4.05 $\pm$ 5.79              |

A: Immunologically quiescent donor. B: Immunologically quiescent donor. C: Immunologically active donor. D: Immunologically active donor.
